# Supplementary material for: High-yield synthesis and fine-tuning aspect ratio of (200) faceted gold nanorods by the pH-adjusting method
Source: Royal Society of Chemistry journal article supplement (doi:10.1039/c7ra04051b), 2017-01-01
Supplement: c7ra04051b1.pdf [file c7ra04051b1.pdf]

---

## Electronic Supporting Information

### High-yield synthesis and fine-tuning aspect ratio of (200) faceted gold nanorods by the “pH-adjusting” method

Yumin Leng,<sup>\*a,d</sup> Xunjun Yin,<sup>d</sup> Fang Hu,<sup>b</sup> Yuehong Zou,<sup>d</sup> Xiaojing Xing,<sup>c</sup> Bo Li,<sup>c</sup> Yongming Guo,<sup>c</sup> Liqun Ye,<sup>\*c</sup> and Zhiwen Lu,<sup>\*a</sup>

<sup>a</sup>College of Physics and Electronic Engineering, Nanyang Normal University, Nanyang  
473061, China

<sup>b</sup>Faculty of Materials Science & Chemical Engineering, Ningbo University, Ningbo  
315201, China

<sup>c</sup>College of Chemistry and Pharmaceutical Engineering, Nanyang Normal University,  
Nanyang 473061, China

<sup>d</sup>Ningbo Institute of Materials Technology & Engineering (NIMTE), Chinese Academy  
of Sciences, Ningbo 315201, China

†Electronic supplementary information (ESI) available.

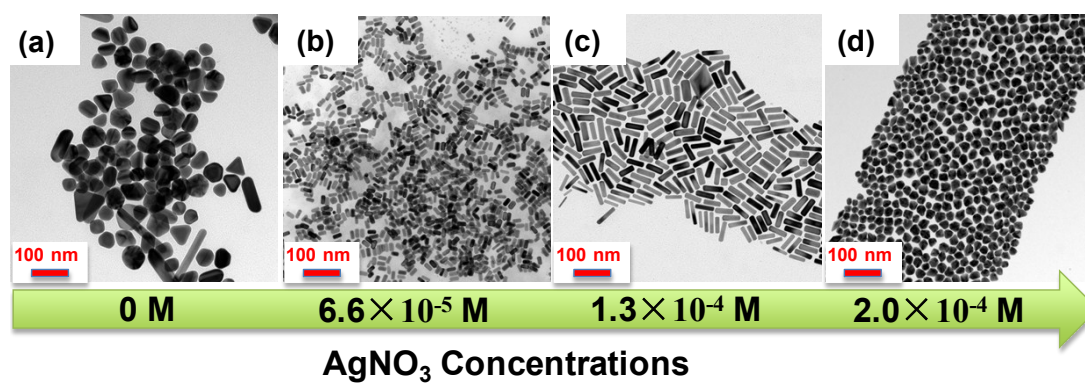

**Fig. S1** TEM images of gold nanoparticles obtained after adding different concentrations of  $\text{AgNO}_3$ : (a) 0 M, (b)  $6.6 \times 10^{-5}$  M, (c)  $1.3 \times 10^{-4}$  M and (d)  $2.0 \times 10^{-4}$  M. The pH of the growth solution was fixed at 6.0 and 0.2 M of CTAB was selected.

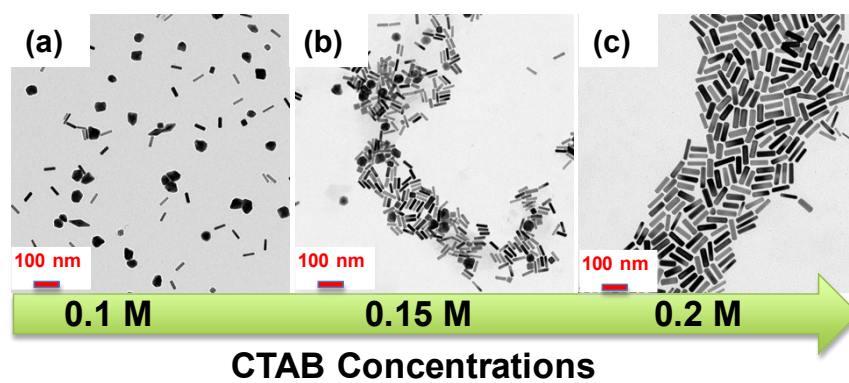

**Fig. S2** TEM images of gold nanoparticles obtained at different CTAB concentrations (a) 0.1 M, (b) 0.15 M and (c) 0.2 M. The pH of the growth solution was fixed at 6.0 and  $1.3 \times 10^{-4}$  M of  $\text{Ag}^+$  was selected.
